# Supplementary material for: Guest-induced single-crystal-to-single-crystal transformations of a new 4-connected 3D cadmium(ii) metal–organic framework
Source: Royal Society of Chemistry journal article supplement (doi:10.1039/c5ra00621j), 2015-01-01
Supplement: c5ra00621j1.pdf [file c5ra00621j1.pdf]

*Electronic Supplementary Information for*

**Guest-induced single-crystal-to-single-crystal transformations of a  
new 4-connected 3D cadmium(II) metal–organic framework**

Shi-Hui Li,<sup>a</sup> Min-Le Han,<sup>a</sup> Guang-Zhen Liu,<sup>a</sup> Lu-Fang Ma,<sup>\*,a</sup> and Li-Ya Wang<sup>\*,a,b</sup>

<sup>a</sup>College of Chemistry and Chemical Engineering, Luoyang Normal University, Luoyang 471022, P. R. China.

<sup>b</sup> College of Chemistry and Pharmaceutical Engineering, Nanyang Normal University, Nanyang 473061, P. R.

China

**Table S1.** Selected bond distances /Å and bond angles /° for **1** and **1a**.

| <b>1</b>            |           |                     |           |
|---------------------|-----------|---------------------|-----------|
| Cd(1)-O(2)          | 1.95(3)   | Cd(1)-O(4)          | 2.322(12) |
| Cd(1)-O(3)#1        | 2.489(15) | Cd(1)-O(6)#2        | 2.492(13) |
| Cd(1)-O(5)#2        | 2.500(12) | Cd(1)-N(1)#3        | 2.508(13) |
| O(2)-Cd(1)-O(4)     | 105.9(10) | O(2)-Cd(1)-O(3)#1   | 93.0(10)  |
| O(4)-Cd(1)-O(3)#1   | 158.0(4)  | O(2)-Cd(1)-O(6)#2   | 170.7(10) |
| O(4)-Cd(1)-O(6)#2   | 83.3(4)   | O(3)#1-Cd(1)-O(6)#2 | 77.7(4)   |
| O(2)-Cd(1)-O(5)#2   | 126.7(14) | O(4)-Cd(1)-O(5)#2   | 81.3(4)   |
| O(3)#1-Cd(1)-O(5)#2 | 78.3(4)   | O(6)#2-Cd(1)-O(5)#2 | 52.5(4)   |
| O(2)-Cd(1)-N(1)#3   | 98.2(14)  | O(4)-Cd(1)-N(1)#3   | 83.2(5)   |
| O(3)#1-Cd(1)-N(1)#3 | 105.6(5)  | O(6)#2-Cd(1)-N(1)#3 | 83.9(4)   |
| O(5)#2-Cd(1)-N(1)#3 | 135.0(4)  |                     |           |
| <b>1a</b>           |           |                     |           |
| Cd(1)-O(1)#1        | 2.298(18) | Cd(1)-O(4)          | 2.435(18) |
| Cd(1)-O(3)          | 2.431(15) | Cd(1)-N(1)#2        | 2.547(17) |

|                     |           |                     |          |
|---------------------|-----------|---------------------|----------|
| Cd(1)-O(2)#3        | 2.597(13) |                     |          |
| O(1)#1-Cd(1)-O(4)   | 80.4(5)   | O(1)#1-Cd(1)-O(3)   | 81.4(5)  |
| O(4)-Cd(1)-O(3)     | 53.1(5)   | O(1)#1-Cd(1)-N(1)#2 | 81.3(6)  |
| O(4)-Cd(1)-N(1)#2   | 81.7(6)   | O(3)-Cd(1)-N(1)#2   | 133.6(6) |
| O(1)#1-Cd(1)-O(2)#3 | 155.7(6)  | O(4)-Cd(1)-O(2)#3   | 76.8(6)  |
| O(3)-Cd(1)-O(2)#3   | 78.3(5)   | N(1)#2-Cd(1)-O(2)#3 | 103.2(5) |

Symmetry operations: Complex **1**: #1:  $y + 1, -x + y + 1, -z + 2$ ; #2:  $y + 1, -x + y + 1, -z + 1$ ; #3:  $-x + 5/3, -y + 1/3, -z + 7/3$ ; Complex **1a**: #1:  $y - 1/3, -x + y + 1/3, -z + 4/3$ ; #2:  $-y + 4/3, x - y + 5/3, z - 4/3$ ; #3:  $x, y, z - 1$ .

**Table S2.** Distance (Å) and angles (°) of hydrogen bonding for **1<sup>a</sup>**.

| D-H...A             | d(D-H) | d(H...A) | d(D...A) | ∠ (DHA) |
|---------------------|--------|----------|----------|---------|
| O(2)-H(4W)···O(5)#6 | 1.35   | 2.04     | 2.91(3)  | 116.9   |
| O(2)-H(3W)···O(3)#1 | 1.21   | 2.58     | 3.24(4)  | 112.5   |
| O(2)-H(3W)···O(1)#6 | 1.21   | 1.90     | 2.61(5)  | 111.7   |
| O(1)-H(2W)···O(5)#2 | 0.85   | 1.97     | 2.82(3)  | 178.3   |
| O(1)-H(1W)···O(1)#5 | 0.85   | 1.96     | 2.81(3)  | 176.4   |

<sup>a</sup>Symmetry codes: #1,  $y + 1, -x + y + 1, -z + 2$ ; #2,  $y + 1, -x + y + 1, -z + 1$ ; #5,  $x - y, x - 1, -z + 1$ ; #6,  $x, y, z + 1$ .

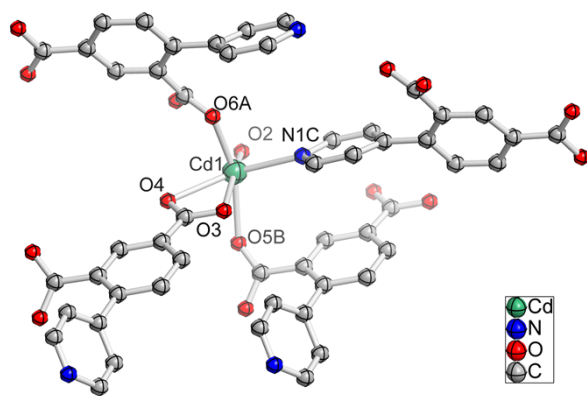

(a)

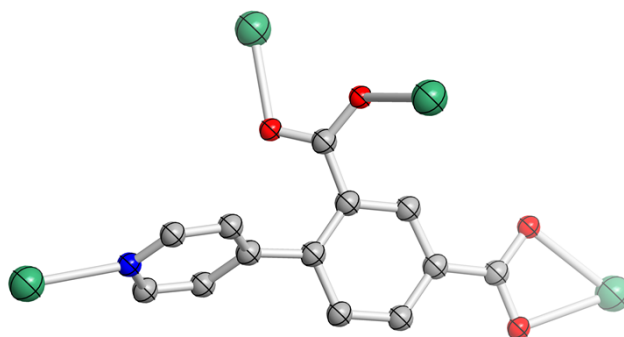

(b)

**Fig. S1.** View of the local coordination geometry of Cd(II) atom (a) and pic ligand (b) in **1**. Hydrogen atoms are omitted for clarity. Symmetry codes, A =  $y, -x + y, -z + 2$ ; B =  $x, y, z + 1$ ; C =  $-y + 2/3, x - y + 1/3, z + 4/3$ .

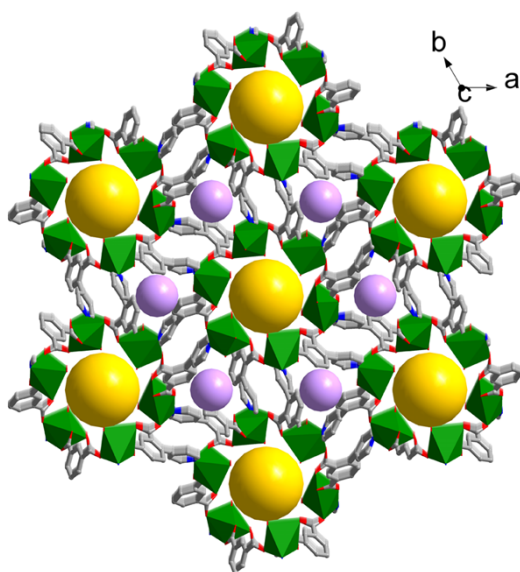

**Fig. S2.** View of the 3D framework shows two different channels, which are highlighted as semitransparent colored spheres (yellow and pink spheres has a diameter of 7.4 and 4.0 Å, respectively).

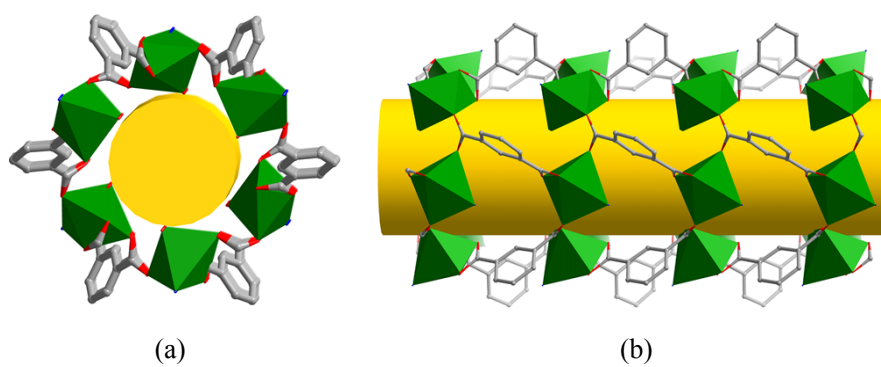

**Fig. S3.** Top (a) and side (b) view of the star-like channel.

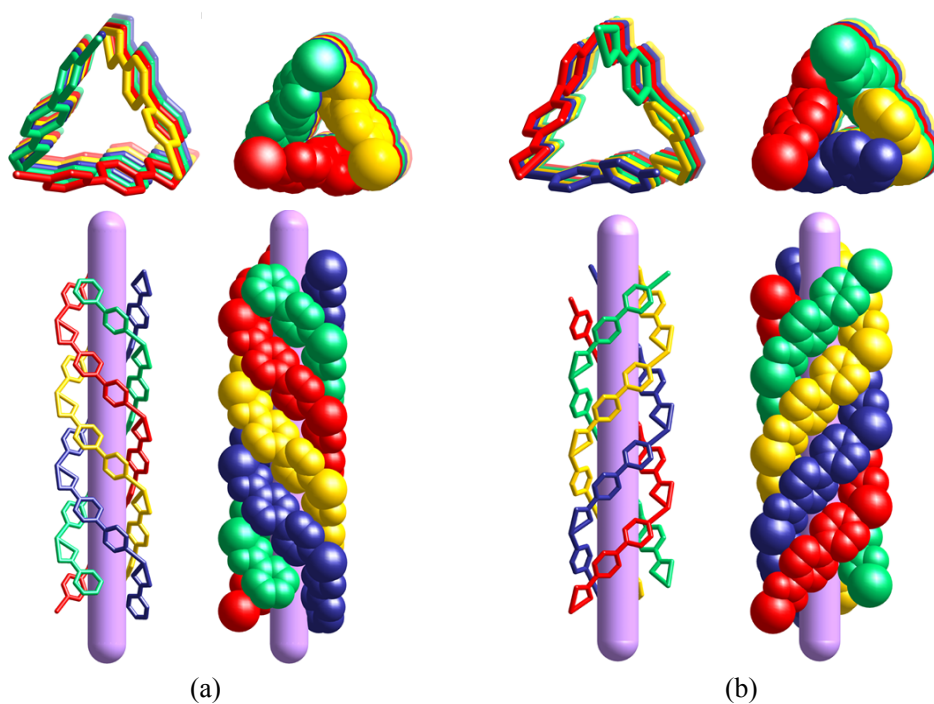

**Fig. S4.** Stick and space-filling view of the four-fold left- (a) and right-handed helical channels (b).

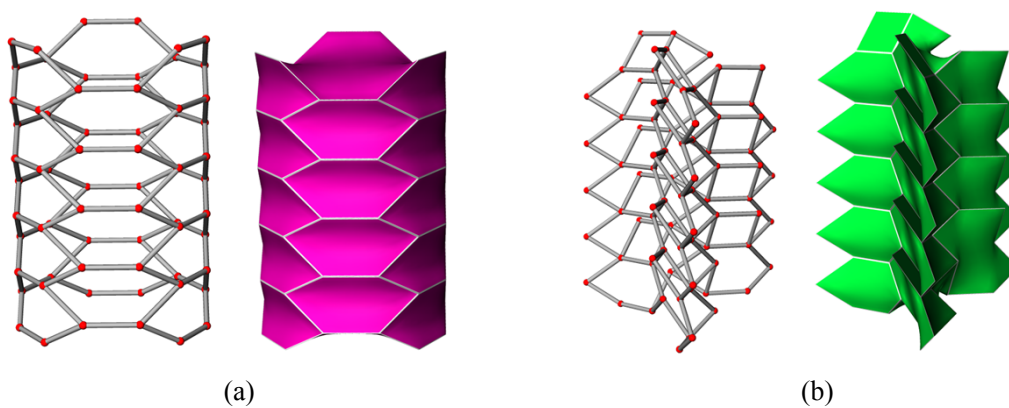

**Fig. S5.** Topological and tilling views of (a)  $(6^3 \cdot 12^2)$  cage, and (b)  $(4 \cdot 6 \cdot 8^3)$  cage.

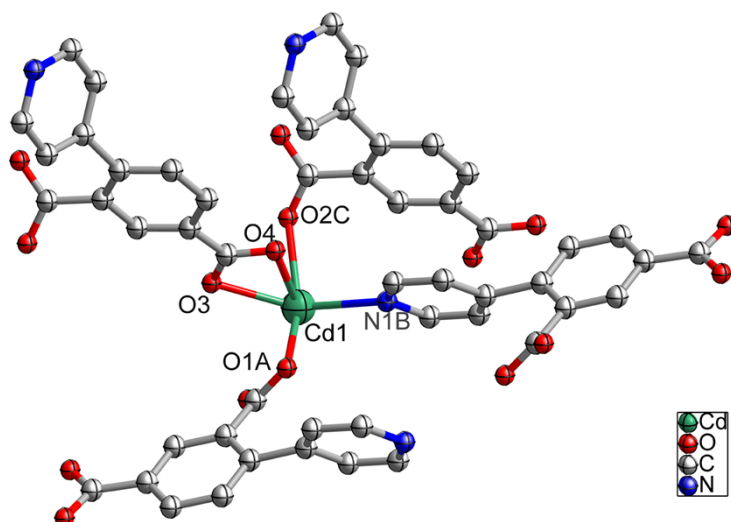

**Fig. S6.** View of the local coordination geometry of Cd(II) atom in **1a**. Hydrogen atoms are omitted for clarity. Symmetry codes, A =  $y - 1/3, -x + y + 1/3, -z + 4/3$ ; b =  $-y + 4/3, x - y + 5/3, z - 4/3$ ; C =  $\#3 x, y, z - 1$ .

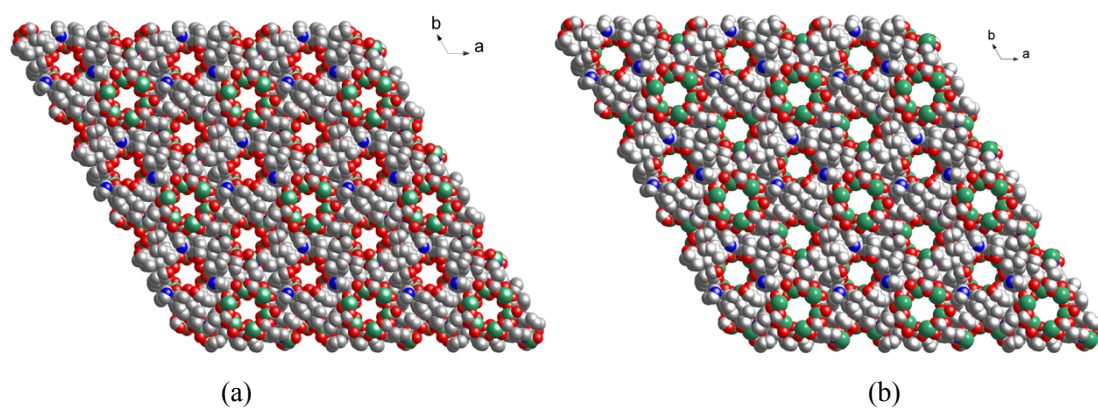

**Fig. S7.** Space-filling view of the 3D porous structures of **1** (a) and **1a** (b).

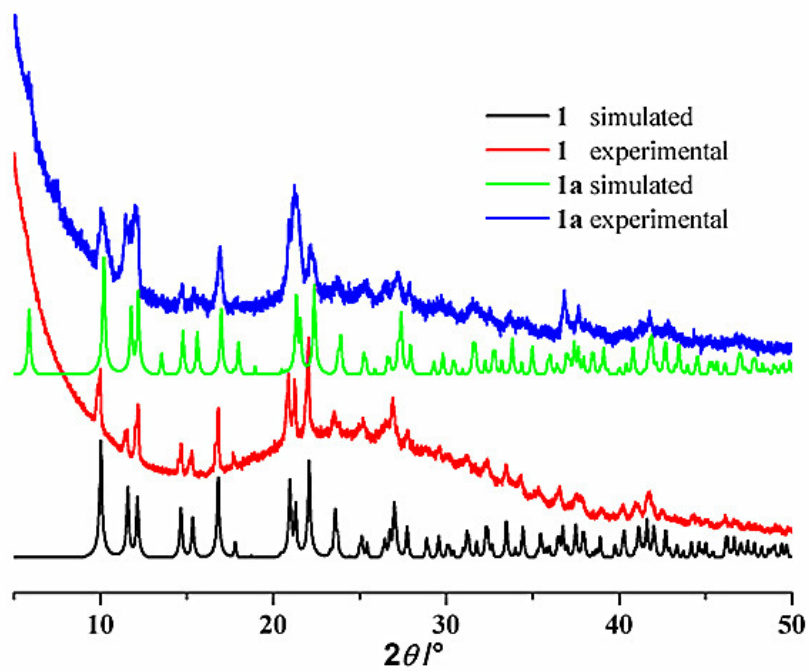

Fig. S8. XRPD patterns of 1 and 1a.

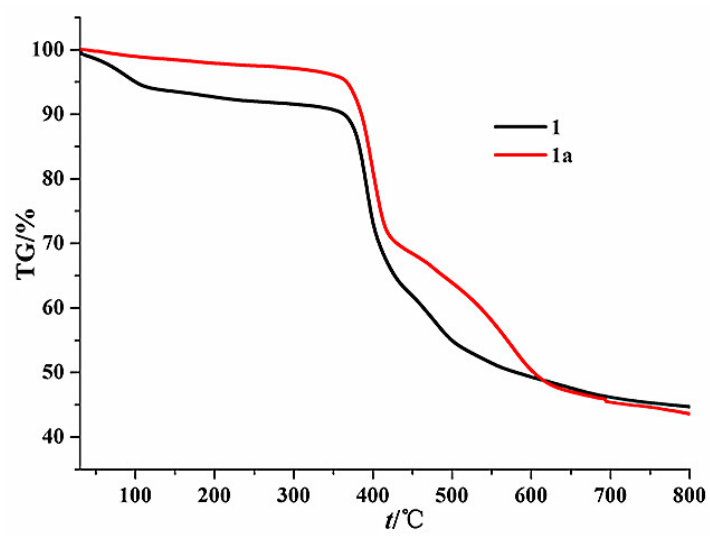

Fig. S9. TGA curve of complexes 1 and 1a.

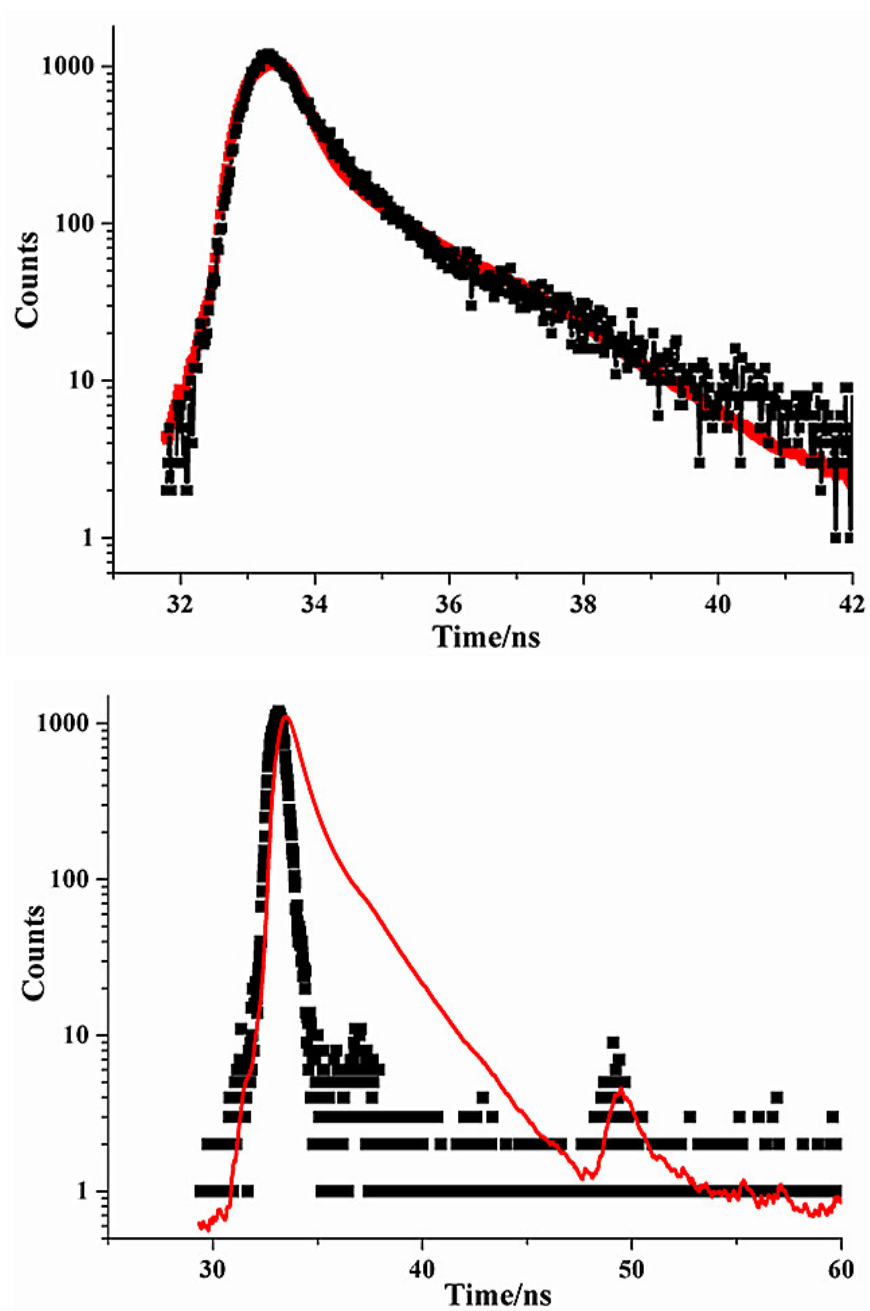

**Fig. S10.** Fluorescence decay curves for pristine **1** at 298 K (top) and 77 K (bottom).

**Table S2.** Photoluminescent lifetime data for **1** at room temperature.

| Temp./K    | Lifetime (ns)   |                 |
|------------|-----------------|-----------------|
|            | $\tau_1$        | $\tau_2$        |
| <b>298</b> | 0.1166 (62.49%) | 1.604 (37.51%)  |
| <b>77</b>  | 0.5235 (54.40%) | 2.219 (45.602%) |

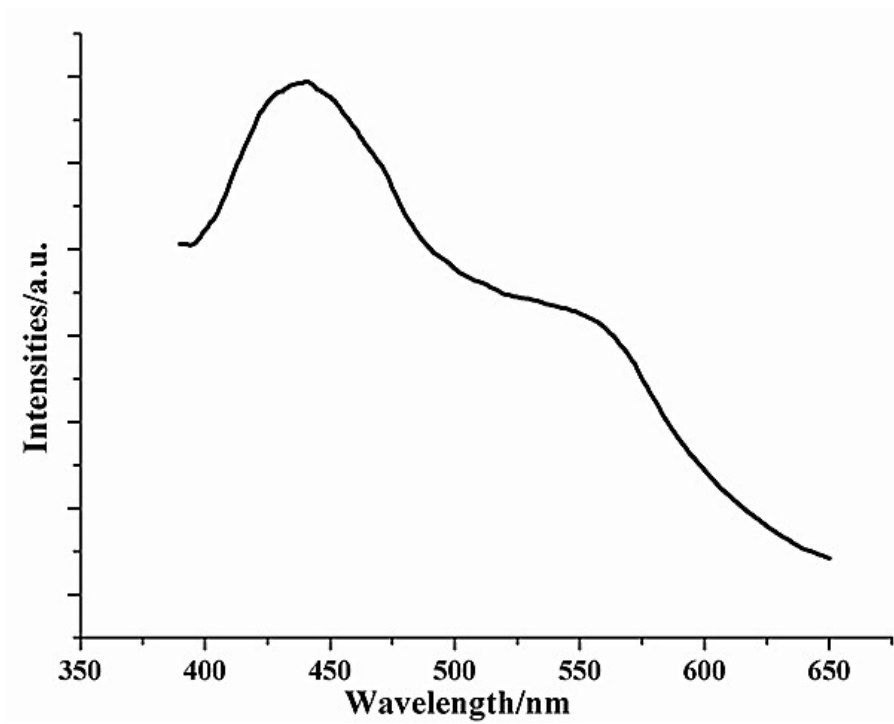

**Fig. S11.** Emission spectrum for solid **1a** at 298 K ( $\lambda_{\text{ex}} = 370$  nm).
